# Supplementary material for: The TAFs of TFIID Bind and Rearrange the Topology of the TATA-Less RPS5 Promoter
Source: MDPI journal article supplement (doi:10.3390/ijms20133290), 2019-07-04
Supplement: s1 [file s1]

## SUPPLEMENTARY MATERIALS accompanying the manuscript “The TAFs of TFIID bind and rearrange the topology of the TATA-less *RPS5* promoter”

### SUPPLEMENTARY FIGURE LEGENDS

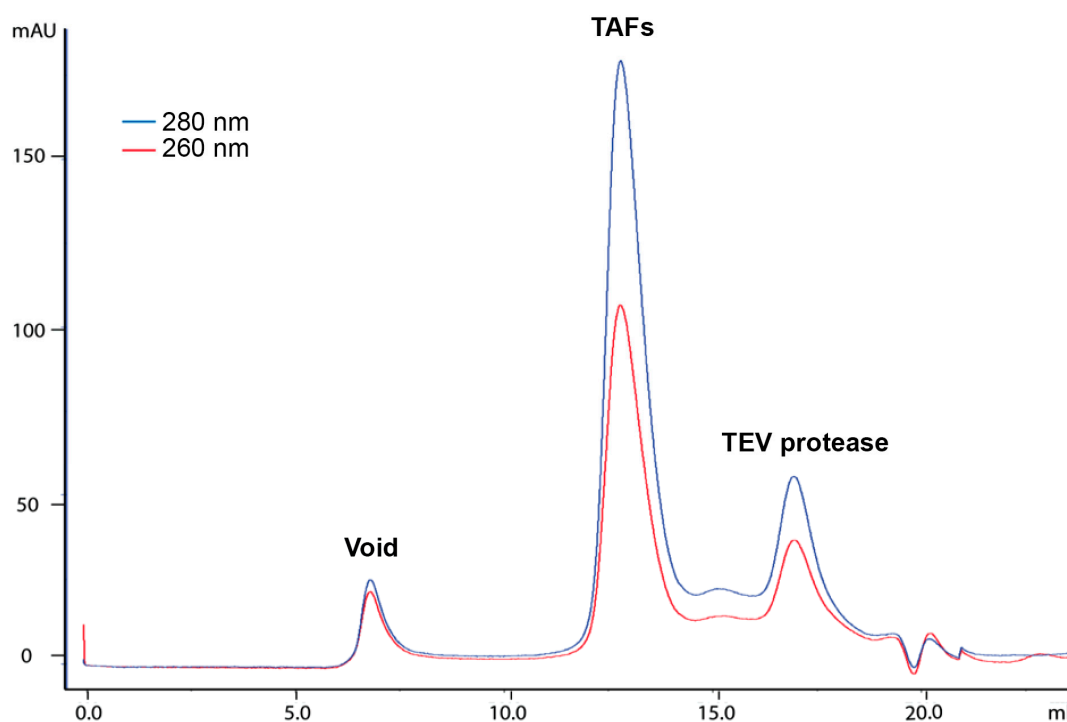

**Supplementary Figure S1.** A size-exclusion chromatography profile of the TAF complex purification.

**TAF5 YEAST** Mass: 89426 Score: 1049 Matches: 30(26) Sequences: 25(23) emPAI: 1.74

Transcription initiation factor TFIID subunit 5 OS=Saccharomyces cerevisiae (strain ATCC 204508 / S288c) GN=TAF5 PE=1 SV=1

☐ Check to include this hit in error tolerant search or archive report

| Query                                                   | Observed  | Mr(expt)  | Mr(calc)  | ppm    | Miss | Score | Expect   | Rank | Unique | Peptide                                 |
|---------------------------------------------------------|-----------|-----------|-----------|--------|------|-------|----------|------|--------|-----------------------------------------|
| <input checked="" type="checkbox"/> <a href="#">50</a>  | 496.2864  | 990.5582  | 990.5750  | -16.88 | 0    | 47    | 0.031    | 1    | U      | R.IVLEYLNK.K                            |
| <input checked="" type="checkbox"/> <a href="#">55</a>  | 506.2456  | 1010.4766 | 1010.4920 | -15.29 | 0    | 52    | 0.0054   | 1    | U      | K.YLLSGSSEDK.L                          |
| <input checked="" type="checkbox"/> <a href="#">73</a>  | 537.7444  | 1073.4742 | 1073.4890 | -13.79 | 0    | 43    | 0.016    | 1    | U      | K.DFHGSEINR.L                           |
| <input checked="" type="checkbox"/> <a href="#">92</a>  | 573.2864  | 1144.5582 | 1144.5764 | -15.89 | 0    | 61    | 0.00082  | 1    | U      | K.NAIYLSYSK.E                           |
| <input checked="" type="checkbox"/> <a href="#">110</a> | 587.3151  | 1172.6156 | 1172.6302 | -12.45 | 0    | 50    | 0.017    | 1    | U      | R.SNLALAGGAFRP.-                        |
| <input checked="" type="checkbox"/> <a href="#">139</a> | 626.7771  | 1251.5396 | 1251.5554 | -12.65 | 0    | 68    | 4.7e-005 | 1    | U      | R.MWDVSTGDSVR.L                         |
| <input checked="" type="checkbox"/> <a href="#">146</a> | 632.7916  | 1263.5687 | 1263.5844 | -12.39 | 0    | 43    | 0.027    | 1    | U      | R.SNGPFSASDLNR.I                        |
| <input checked="" type="checkbox"/> <a href="#">162</a> | 642.3332  | 1282.6518 | 1282.6557 | -3.06  | 0    | 72    | 7e-005   | 1    | U      | R.IAAAGFQDSYIK.I                        |
| <input checked="" type="checkbox"/> <a href="#">189</a> | 673.8178  | 1345.6211 | 1345.6262 | -3.83  | 0    | 63    | 0.00029  | 1    | U      | K.ENEVASAFQSHK.Y                        |
| <input checked="" type="checkbox"/> <a href="#">208</a> | 694.8590  | 1387.7034 | 1387.7095 | -4.41  | 0    | 74    | 5.1e-005 | 1    | U      | R.LEGLNAPENYIR.A                        |
| <input checked="" type="checkbox"/> <a href="#">244</a> | 729.3942  | 1456.7738 | 1456.7885 | -10.13 | 0    | 68    | 0.00019  | 1    | U      | K.TAKPISNPTNLSSK.R                      |
| <input checked="" type="checkbox"/> <a href="#">272</a> | 762.8820  | 1523.7494 | 1523.7692 | -13.01 | 0    | 55    | 0.0035   | 1    | U      | K.EGNVLISGGADHTVR.V                     |
| <input checked="" type="checkbox"/> <a href="#">304</a> | 821.4386  | 1640.8627 | 1640.8662 | -2.10  | 0    | 92    | 7.3e-007 | 1    | U      | R.TVIPTSDLVASFYTK.K                     |
| <input checked="" type="checkbox"/> <a href="#">366</a> | 925.9168  | 1849.8191 | 1849.8303 | -6.02  | 0    | 81    | 2.7e-006 | 1    | U      | K.QLNQQTAGDNYSGANNR.T                   |
| <input checked="" type="checkbox"/> <a href="#">380</a> | 935.9650  | 1904.8732 | 1904.9089 | -18.76 | 0    | 34    | 0.19     | 1    | U      | K.QSTNQNGNTHQPPVK.N                     |
| <input checked="" type="checkbox"/> <a href="#">407</a> | 998.9779  | 1995.9412 | 1995.9538 | -6.33  | 0    | (47)  | 0.014    | 1    | U      | K.TLVGHSSTVYSTSFSPDNK.Y                 |
| <input checked="" type="checkbox"/> <a href="#">408</a> | 666.3210  | 1995.9412 | 1995.9538 | -6.33  | 0    | 66    | 0.00015  | 1    | U      | K.TLVGHSSTVYSTSFSPDNK.Y                 |
| <input checked="" type="checkbox"/> <a href="#">414</a> | 1012.0349 | 2022.0552 | 2022.0721 | -8.33  | 0    | (32)  | 0.48     | 1    | U      | R.LFLGHTAFVSIACVDPGR.W                  |
| <input checked="" type="checkbox"/> <a href="#">415</a> | 675.0257  | 2022.0554 | 2022.0721 | -8.27  | 0    | 46    | 0.02     | 1    | U      | R.LFLGHTAFVSIACVDPGR.W                  |
| <input checked="" type="checkbox"/> <a href="#">448</a> | 1074.5279 | 2147.0413 | 2147.0535 | -5.68  | 0    | (11)  | 66       | 1    | U      | R.WLSTGSEDGIINVWDIGTGK.R                |
| <input checked="" type="checkbox"/> <a href="#">449</a> | 1074.5291 | 2147.0436 | 2147.0535 | -4.60  | 0    | 119   | 1e-009   | 1    | U      | R.WLSTGSEDGIINVWDIGTGK.R                |
| <input checked="" type="checkbox"/> <a href="#">450</a> | 716.6885  | 2147.0436 | 2147.0535 | -4.60  | 0    | (65)  | 0.00026  | 1    | U      | R.WLSTGSEDGIINVWDIGTGK.R                |
| <input checked="" type="checkbox"/> <a href="#">580</a> | 900.0725  | 2697.1958 | 2697.2200 | -8.96  | 0    | 41    | 0.017    | 1    | U      | R.TNNAAGANSQQPQQSQSQSQGGR.S             |
| <input checked="" type="checkbox"/> <a href="#">626</a> | 1026.8220 | 3077.4442 | 3077.4717 | -8.93  | 0    | 62    | 0.00022  | 1    | U      | K.ATTEPSAEPDEPFTIGYLGVDVTSINQDIK.E      |
| <input checked="" type="checkbox"/> <a href="#">629</a> | 627.6931  | 3133.4294 | 3133.4543 | -7.97  | 0    | (106) | 5.4e-009 | 1    | U      | K.GHNHPVWDVFSPLGHYFATASHDQTR.L          |
| <input checked="" type="checkbox"/> <a href="#">630</a> | 784.3650  | 3133.4309 | 3133.4543 | -7.48  | 0    | 112   | 1.6e-009 | 1    | U      | K.GHNHPVWDVFSPLGHYFATASHDQTR.L          |
| <input checked="" type="checkbox"/> <a href="#">633</a> | 1048.8174 | 3143.4302 | 3143.4465 | -5.19  | 1    | 80    | 2.2e-006 | 1    | U      | K.IWSLDGSSLNPNIALNNDDKEDPTCK.T          |
| <input checked="" type="checkbox"/> <a href="#">641</a> | 1069.5186 | 3205.5341 | 3205.5667 | -10.17 | 1    | 65    | 0.00013  | 1    | U      | K.KATTEPSAEPDEPFTIGYLGVDVTSINQDIK.E     |
| <input checked="" type="checkbox"/> <a href="#">680</a> | 971.2566  | 3880.9973 | 3881.0405 | -11.14 | 0    | 54    | 0.00084  | 1    | U      | K.NWVDSLEIYKPELSYIMYPIFYLFNLVAK.N       |
| <input checked="" type="checkbox"/> <a href="#">708</a> | 1146.5968 | 4582.3582 | 4581.4061 | 208    | 1    | 1     | 1e+002   | 1    | U      | K.NWVDSLEIYKPELSYIMYPIFYLFNLVAKNPVYAR.R |

**TAF2 YEAST** Mass: 162851 Score: 701 Matches: 26(17) Sequences: 24(16) emPAI: 0.52

Transcription initiation factor TFIID subunit 2 OS=Saccharomyces cerevisiae (strain ATCC 204508 / S288c) GN=TAF2 PE=1 SV=3

☐ Check to include this hit in error tolerant search or archive report

| Query                                                   | Observed  | Mr(expt)  | Mr(calc)  | ppm    | Miss | Score | Expect   | Rank | Unique | Peptide                               |
|---------------------------------------------------------|-----------|-----------|-----------|--------|------|-------|----------|------|--------|---------------------------------------|
| <input checked="" type="checkbox"/> <a href="#">41</a>  | 481.7412  | 961.4679  | 961.4902  | -23.22 | 0    | 48    | 0.021    | 1    | U      | R.LAACEALSK.Y                         |
| <input checked="" type="checkbox"/> <a href="#">56</a>  | 506.2532  | 1010.4918 | 1010.5073 | -15.36 | 0    | 49    | 0.014    | 1    | U      | K.VVGEEGFFK.S                         |
| <input checked="" type="checkbox"/> <a href="#">59</a>  | 510.7541  | 1019.4936 | 1019.5135 | -19.47 | 0    | 27    | 2.7      | 1    | U      | R.TSESNELK.Q                          |
| <input checked="" type="checkbox"/> <a href="#">104</a> | 581.8168  | 1161.6191 | 1161.6394 | -17.45 | 0    | 35    | 0.48     | 1    | U      | K.ELPHFDLTK.K                         |
| <input checked="" type="checkbox"/> <a href="#">119</a> | 601.8460  | 1201.6774 | 1201.6958 | -15.29 | 0    | 36    | 0.35     | 1    | U      | R.LLYPLEVIDK.A                        |
| <input checked="" type="checkbox"/> <a href="#">124</a> | 607.2935  | 1212.5725 | 1212.6099 | -30.81 | 0    | 63    | 0.00037  | 1    | U      | K.SSVQSVHNEVK.N                       |
| <input checked="" type="checkbox"/> <a href="#">150</a> | 636.8050  | 1271.5954 | 1271.6106 | -11.91 | 0    | 60    | 0.00069  | 1    | U      | R.NIEESNNPSLR.D                       |
| <input checked="" type="checkbox"/> <a href="#">169</a> | 648.3343  | 1294.6540 | 1294.6744 | -15.71 | 0    | 36    | 0.28     | 1    | U      | K.LYFLQCNIK.Y                         |
| <input checked="" type="checkbox"/> <a href="#">172</a> | 651.3455  | 1300.6764 | 1300.6921 | -12.11 | 0    | 83    | 7.6e-006 | 1    | U      | R.QNISGLIQLCR.D                       |
| <input checked="" type="checkbox"/> <a href="#">173</a> | 651.7880  | 1301.5614 | 1301.5744 | -10.01 | 0    | 22    | 1.6      | 1    | U      | R.TECFTGSMIR.I                        |
| <input checked="" type="checkbox"/> <a href="#">200</a> | 680.8173  | 1359.6200 | 1359.6347 | -10.78 | 0    | 58    | 0.00087  | 1    | U      | K.YVYDPDFTGGVK.H                      |
|                                                         |           |           |           |        |      |       |          |      |        |                                       |
| <input checked="" type="checkbox"/> <a href="#">239</a> | 721.3860  | 1440.7574 | 1440.7799 | -15.62 | 0    | 43    | 0.053    | 1    | U      | R.VMYTLINSFVVR.L                      |
| <input checked="" type="checkbox"/> <a href="#">256</a> | 742.8691  | 1483.7236 | 1483.7381 | -9.74  | 0    | 63    | 0.00049  | 1    | U      | R.ESFQNEFLMLK.I                       |
| <input checked="" type="checkbox"/> <a href="#">263</a> | 750.8417  | 1499.6688 | 1499.6780 | -6.09  | 0    | 78    | 5.9e-006 | 1    | U      | K.FASLNEYPTDSK.S                      |
| <input checked="" type="checkbox"/> <a href="#">266</a> | 753.3569  | 1504.6993 | 1504.6915 | 5.18   | 0    | 47    | 0.014    | 1    | U      | K.HMDFALGICNTR.L                      |
| <input checked="" type="checkbox"/> <a href="#">292</a> | 793.8572  | 1585.6998 | 1585.7116 | -7.46  | 0    | 55    | 0.00099  | 1    | U      | R.DVIVCCSEYSNIK.E                     |
| <input checked="" type="checkbox"/> <a href="#">381</a> | 955.4742  | 1908.9339 | 1907.9629 | 509    | 0    | 10    | 83       | 2    | U      | K.QFLDLIVYNENGENK.Y                   |
| <input checked="" type="checkbox"/> <a href="#">384</a> | 639.6462  | 1915.9167 | 1915.9428 | -13.64 | 0    | 54    | 0.0032   | 1    | U      | R.IHEHDTPTYEHIVEIK.D                  |
| <input checked="" type="checkbox"/> <a href="#">392</a> | 979.4905  | 1956.9665 | 1956.9832 | -8.53  | 0    | 69    | 0.00012  | 1    | U      | R.YENLVNWLSSYESLIK.T                  |
| <input checked="" type="checkbox"/> <a href="#">422</a> | 1028.0936 | 2054.1726 | 2054.1928 | -9.82  | 0    | 0     | 3.4e+002 | 1    | U      | K.ILLWDVLNLPVLSLYQR.K                 |
| <input checked="" type="checkbox"/> <a href="#">435</a> | 704.9803  | 2111.9190 | 2111.9357 | -7.94  | 0    | 53    | 0.0011   | 1    | U      | K.SEDDIELFLSGHYVDDMK.I                |
| <input checked="" type="checkbox"/> <a href="#">443</a> | 1070.5364 | 2139.0582 | 2139.0789 | -9.68  | 0    | 95    | 2.4e-007 | 1    | U      | K.LENFFNEWVYSGVPILR.V                 |
| <input checked="" type="checkbox"/> <a href="#">444</a> | 714.0267  | 2139.0582 | 2139.0789 | -9.68  | 0    | (84)  | 3.3e-006 | 1    | U      | K.LENFFNEWVYSGVPILR.V                 |
| <input checked="" type="checkbox"/> <a href="#">446</a> | 716.3739  | 2146.0999 | 2146.1157 | -7.37  | 0    | (20)  | 8.2      | 1    | U      | K.ISLEDANALSNTYPTIPSIK.T              |
| <input checked="" type="checkbox"/> <a href="#">447</a> | 1074.0572 | 2146.0999 | 2146.1157 | -7.37  | 0    | 81    | 7.5e-006 | 1    | U      | K.ISLEDANALSNTYPTIPSIK.T              |
| <input checked="" type="checkbox"/> <a href="#">699</a> | 1055.4923 | 4217.9400 | 4217.9713 | -7.41  | 0    | 33    | 0.067    | 1    | U      | R.CDQFHDPLQTNLGLTSQNVLYSDNSIEQSHFLR.S |

**TAF14 YEAST** Mass: 27423 Score: 605 Matches: 13(11) Sequences: 9(8) emPAI: 2.53

Transcription initiation factor TFIID subunit 14 OS=Saccharomyces cerevisiae (strain ATCC 204508 / S288c) GN=TAF14 PE=1 SV=1

☐ Check to include this hit in error tolerant search or archive report

| Query                                   | Observed  | Mr(expt)  | Mr(calc)  | ppm    | Miss | Score | Expect   | Rank | Unique | Peptide                               |
|-----------------------------------------|-----------|-----------|-----------|--------|------|-------|----------|------|--------|---------------------------------------|
| <input checked="" type="checkbox"/> 33  | 455.7332  | 909.4518  | 909.4596  | -8.53  | 0    | 25    | 3.6      | 1    | U      | K.SLWDYVK.K                           |
| <input checked="" type="checkbox"/> 282 | 777.3662  | 1552.7178 | 1552.7217 | -2.51  | 0    | 106   | 1.6e-008 | 1    | U      | K.SGSTEETTANTGTIGK.R                  |
| <input checked="" type="checkbox"/> 317 | 560.2915  | 1677.8527 | 1677.8739 | -12.64 | 0    | 69    | 0.00015  | 1    | U      | K.VIYHLHPTFANPNR.T                    |
| <input checked="" type="checkbox"/> 372 | 944.9662  | 1887.9178 | 1887.9248 | -3.73  | 0    | 149   | 1.2e-012 | 1    | U      | K.LNEDDLVGVMVMDNK.F                   |
| <input checked="" type="checkbox"/> 373 | 630.3138  | 1887.9197 | 1887.9248 | -2.72  | 0    | (74)  | 3.6e-005 | 1    | U      | K.LNEDDLVGVMVMDNK.T                   |
| <input checked="" type="checkbox"/> 430 | 700.7105  | 2099.1097 | 2099.1164 | -3.17  | 0    | 77    | 1.6e-005 | 1    | U      | K.TQQHILPEVPPVENFPVR.Q                |
| <input checked="" type="checkbox"/> 431 | 1050.5637 | 2099.1129 | 2099.1164 | -1.64  | 0    | (18)  |          | 12   | U      | K.TQQHILPEVPPVENFPVR.Q                |
| <input checked="" type="checkbox"/> 485 | 759.7246  | 2276.1521 | 2276.1729 | -9.15  | 0    | (50)  | 0.0084   | 1    | U      | R.IEEQMGQFPPLDISVFLEK.A               |
| <input checked="" type="checkbox"/> 486 | 1139.0833 | 2276.1521 | 2276.1729 | -9.14  | 0    | 55    | 0.0022   | 1    | U      | R.IEEQMGQFPPLDISVFLEK.A               |
| <input checked="" type="checkbox"/> 572 | 887.1247  | 2658.3522 | 2658.3792 | -10.17 | 1    | 60    | 0.00059  | 1    | U      | R.QWSIEIVLLDDEGEIPATIFDK.V            |
| <input checked="" type="checkbox"/> 635 | 1055.5184 | 3163.5335 | 3163.5635 | -9.48  | 0    | 88    | 5.8e-007 | 1    | U      | K.TPMNVTNNVEGEFIIDLYSLPEGLLK.S        |
| <input checked="" type="checkbox"/> 689 | 1000.2885 | 3997.1249 | 3997.1564 | -7.89  | 1    | (44)  | 0.0073   | 1    | U      | R.KIPHDNLFLQSEYEVEHVQIPLNPKLLTEELAK.S |
| <input checked="" type="checkbox"/> 690 | 800.4322  | 3997.1249 | 3997.1564 | -7.88  | 1    | 47    | 0.0034   | 1    | U      | R.KIPHDNLFLQSEYEVEHVQIPLNPKLLTEELAK.S |

**TAF6 YEAST** Mass: 57980 Score: 550 Matches: 17(11) Sequences: 13(9) emPAI: 1.29

Transcription initiation factor TFIID subunit 6 OS=Saccharomyces cerevisiae (strain ATCC 204508 / S288c) GN=TAF6 PE=1 SV=1

☐ Check to include this hit in error tolerant search or archive report

| Query                                   | Observed  | Mr(expt)  | Mr(calc)  | ppm    | Miss | Score | Expect   | Rank | Unique | Peptide                                            |
|-----------------------------------------|-----------|-----------|-----------|--------|------|-------|----------|------|--------|----------------------------------------------------|
| <input checked="" type="checkbox"/> 77  | 546.7649  | 1091.5153 | 1091.5347 | -17.76 | 0    | 43    | 0.043    | 1    | U      | R.DVLTTDDVSK.A                                     |
| <input checked="" type="checkbox"/> 93  | 573.3041  | 1144.5936 | 1144.6088 | -13.25 | 0    | 53    | 0.008    | 1    | U      | K.GVSVLEGESIR.F                                    |
| <input checked="" type="checkbox"/> 94  | 573.3052  | 1144.5958 | 1144.6088 | -11.38 | 0    | (32)  | 0.92     | 1    | U      | K.GVSVLEGESIR.F                                    |
| <input checked="" type="checkbox"/> 100 | 578.3486  | 1154.6827 | 1154.6910 | -7.22  | 0    | 58    | 0.001    | 2    | U      | R.ILEIIEQAVK.F                                     |
| <input checked="" type="checkbox"/> 122 | 604.2895  | 1206.5645 | 1206.5743 | -8.15  | 0    | 50    | 0.0087   | 1    | U      | R.VFGTYGCLK.G                                      |
| <input checked="" type="checkbox"/> 136 | 622.8315  | 1243.6484 | 1243.6747 | -21.20 | 0    | 32    | 0.9      | 1    | U      | R.CGVGTIGPHLK.R                                    |
| <input checked="" type="checkbox"/> 193 | 676.3407  | 1350.6669 | 1350.6833 | -12.11 | 0    | 42    | 0.069    | 1    | U      | R.FFLGNLNNWR.L                                     |
| <input checked="" type="checkbox"/> 194 | 677.8587  | 1353.7028 | 1353.7180 | -11.25 | 0    | 78    | 1.9e-005 | 1    | U      | R.DFAASLLDYVLK.K                                   |
| <input checked="" type="checkbox"/> 298 | 807.8664  | 1613.7183 | 1613.7321 | -8.58  | 0    | 48    | 0.0063   | 1    | U      | K.DDSPQIEHFLEK.T                                   |
| <input checked="" type="checkbox"/> 401 | 662.0466  | 1983.1180 | 1983.1503 | -16.31 | 0    | (29)  | 0.58     | 1    | U      | K.EETQILVDTVISALLVLK.K                             |
| <input checked="" type="checkbox"/> 402 | 992.5731  | 1983.1316 | 1983.1503 | -9.44  | 0    | 92    | 2.7e-007 | 1    | U      | K.EETQILVDTVISALLVLK.K                             |
| <input checked="" type="checkbox"/> 403 | 662.0516  | 1983.1329 | 1983.1503 | -8.78  | 0    | (72)  | 2.5e-005 | 1    | U      | K.EETQILVDTVISALLVLK.K                             |
| <input checked="" type="checkbox"/> 423 | 1030.0014 | 2057.9883 | 2057.9946 | -3.06  | 0    | 75    | 2.1e-005 | 1    | U      | R.VLNVEPLYGYDQSEVVK.A                              |
| <input checked="" type="checkbox"/> 606 | 948.1187  | 2841.3342 | 2841.3417 | -2.64  | 0    | 132   | 2.5e-011 | 1    | U      | R.LVFNMSGITLDNIEEHLNDSNPTR.T                       |
| <input checked="" type="checkbox"/> 607 | 711.3415  | 2841.3370 | 2841.3417 | -1.64  | 0    | (67)  | 7.6e-005 | 1    | U      | R.LVFNMSGITLDNIEEHLNDSNPTR.T                       |
| <input checked="" type="checkbox"/> 634 | 790.1714  | 3156.6565 | 3156.6720 | -4.90  | 0    | 21    | 2.7      | 1    | U      | R.LPTFTTHLAVGVQPAIIQNPNLDIR.V                      |
| <input checked="" type="checkbox"/> 717 | 1010.3225 | 5046.5759 | 5046.6110 | -6.95  | 0    | 32    | 0.065    | 1    | U      | R.GAIVTALNDSLQTFVTSTASAVTDTGASQHLNPKVQNTVEVKPLVK.. |

**TAF1 YEAST** Mass: 120849 Score: 537 Matches: 15(11) Sequences: 13(10) emPAI: 0.45

Transcription initiation factor TFIID subunit 1 OS=Saccharomyces cerevisiae (strain ATCC 204508 / S288c) GN=TAF1 PE=1 SV=1

☐ Check to include this hit in error tolerant search or archive report

| Query                                   | Observed  | Mr(expt)  | Mr(calc)  | ppm    | Miss | Score | Expect   | Rank | Unique | Peptide                     |
|-----------------------------------------|-----------|-----------|-----------|--------|------|-------|----------|------|--------|-----------------------------|
| <input checked="" type="checkbox"/> 80  | 551.2828  | 1100.5511 | 1100.5713 | -18.37 | 0    | 56    | 0.003    | 1    | U      | K.INNLELEK.Q                |
| <input checked="" type="checkbox"/> 163 | 642.3735  | 1282.7324 | 1282.7496 | -13.37 | 0    | 39    | 0.099    | 1    | U      | K.LLQLELANLEK.S             |
| <input checked="" type="checkbox"/> 166 | 645.8135  | 1289.6125 | 1289.6324 | -15.42 | 0    | 37    | 0.19     | 1    | U      | K.NNLLQSNSSASR.R            |
| <input checked="" type="checkbox"/> 171 | 433.8928  | 1298.6567 | 1298.6942 | -28.90 | 1    | 32    | 0.67     | 1    | U      | R.KANEQDTLRPK.L             |
| <input checked="" type="checkbox"/> 190 | 673.8454  | 1345.6763 | 1345.6878 | -8.53  | 0    | 46    | 0.037    | 1    | U      | K.HDISGDTFLTK.S             |
| <input checked="" type="checkbox"/> 259 | 746.4012  | 1490.7878 | 1490.8093 | -14.40 | 0    | 71    | 9.9e-005 | 1    | U      | K.LPVGETHVLGVQDK.S          |
| <input checked="" type="checkbox"/> 260 | 497.9366  | 1490.7879 | 1490.8093 | -14.39 | 0    | (40)  | 0.11     | 1    | U      | K.LPVGETHVLGVQDK.S          |
| <input checked="" type="checkbox"/> 283 | 778.9121  | 1555.8097 | 1555.8246 | -9.58  | 0    | 58    | 0.0017   | 1    | U      | K.SLEENLLPWNIK.N            |
| <input checked="" type="checkbox"/> 336 | 579.6605  | 1735.9598 | 1735.9985 | -22.26 | 1    | 41    | 0.054    | 1    | U      | R.RGLIHVSIDELFPK.E          |
| <input checked="" type="checkbox"/> 342 | 889.8990  | 1777.7835 | 1777.7966 | -7.38  | 0    | 123   | 1.7e-010 | 1    | U      | R.TENSVDNGSDLAGVTDGK.A      |
| <input checked="" type="checkbox"/> 405 | 996.4696  | 1990.9246 | 1990.9371 | -6.30  | 0    | 83    | 3.1e-006 | 1    | U      | K.TISEDLLIATDDWQEK.I        |
| <input checked="" type="checkbox"/> 490 | 765.7499  | 2294.2278 | 2294.2481 | -8.87  | 0    | (66)  | 0.00017  | 1    | U      | K.QQLDSSNLILPLNETILQOK.F    |
| <input checked="" type="checkbox"/> 491 | 1148.1212 | 2294.2278 | 2294.2481 | -8.87  | 0    | 92    | 4.3e-007 | 1    | U      | K.QQLDSSNLILPLNETILQOK.F    |
| <input checked="" type="checkbox"/> 498 | 774.3663  | 2320.0770 | 2320.0981 | -9.08  | 0    | 78    | 7.1e-006 | 1    | U      | R.AMIQIHGVDPTGCGEGFSLK.T    |
| <input checked="" type="checkbox"/> 555 | 856.0997  | 2565.2774 | 2565.2976 | -7.86  | 0    | 87    | 1.1e-006 | 1    | U      | R.NINHLFTVGQTFVVEIIPGNRSR.K |

**TAF3 YEAST** Mass: 40385 Score: 444 Matches: 13(9) Sequences: 13(9) emPAI: 1.03

Transcription initiation factor TFIID subunit 3 OS=Saccharomyces cerevisiae (strain ATCC 204508 / S288c) GN=TAF3 PE=1 SV=1

☐ Check to include this hit in error tolerant search or archive report

| Query                                   | Observed  | Mr(expt)  | Mr(calc)  | ppm    | Miss | Score | Expect   | Rank | Unique | Peptide                                     |
|-----------------------------------------|-----------|-----------|-----------|--------|------|-------|----------|------|--------|---------------------------------------------|
| <input checked="" type="checkbox"/> 34  | 464.3041  | 926.5937  | 926.6164  | -24.54 | 0    | 43    | 0.021    | 1    | U      | R.ISILQLLK.A                                |
| <input checked="" type="checkbox"/> 199 | 454.2053  | 1359.5941 | 1359.6280 | -24.94 | 0    | 51    | 0.0023   | 1    | U      | R.HHHTTITNEDR.M                             |
| <input checked="" type="checkbox"/> 250 | 737.8634  | 1473.7123 | 1473.7252 | -8.78  | 0    | 63    | 0.00047  | 1    | U      | M.TTNDFYFALLR.I                             |
| <input checked="" type="checkbox"/> 313 | 835.9597  | 1669.9049 | 1669.9138 | -5.32  | 0    | 86    | 2.7e-006 | 1    | U      | R.ITALPTVELLQSEK.E                          |
| <input checked="" type="checkbox"/> 316 | 839.9336  | 1677.8527 | 1677.8760 | -13.86 | 0    | 2     | 6.8e+002 | 1    | U      | R.ARPSTLVDMTDLAK.F                          |
| <input checked="" type="checkbox"/> 322 | 846.4618  | 1690.9089 | 1690.9254 | -9.70  | 0    | 109   | 1.2e-008 | 1    | U      | K.FLSLLASEVSSIAQAR.C                        |
| <input checked="" type="checkbox"/> 387 | 968.4576  | 1934.9007 | 1934.9109 | -5.27  | 0    | 77    | 1.2e-005 | 1    | U      | R.DEDALTEIQENPFTSK.L                        |
| <input checked="" type="checkbox"/> 436 | 1058.0212 | 2114.0278 | 2114.0531 | -11.97 | 0    | 55    | 0.0026   | 1    | U      | K.TELIEDLINNGLDQWK.L                        |
| <input checked="" type="checkbox"/> 453 | 1079.5466 | 2157.0786 | 2157.0953 | -7.76  | 0    | 9     | 1e+002   | 1    | U      | K.ESDPLSAIPDYLNLQLNK.G                      |
| <input checked="" type="checkbox"/> 478 | 748.3780  | 2242.1120 | 2242.1481 | -16.09 | 1    | 10    | 75       | 1    | U      | R.KTELIEDLINNGLDQWK.L                       |
| <input checked="" type="checkbox"/> 602 | 940.4421  | 2818.3045 | 2818.3396 | -12.44 | 0    | 75    | 9.8e-006 | 1    | U      | R.LENITLSFEDEELESLEGEVGNQK.S                |
| <input checked="" type="checkbox"/> 676 | 953.2489  | 3808.9664 | 3808.9985 | -8.44  | 1    | 15    | 7.4      | 1    | U      | R.ITALPTVELLQSEKESDPLSAIPDYLNLQLNK.G        |
| <input checked="" type="checkbox"/> 707 | 1141.7995 | 4563.1689 | 4563.2174 | -10.62 | 0    | 100   | 1.2e-008 | 1    | U      | R.CQDDTIALQDITALENIGIVKPTNVLVDYDENSELSSSR.G |

**TAF12 YEAST** Mass: 61150 Score: 425 Matches: 14(10) Sequences: 14(10) emPAI: 0.69

Transcription initiation factor TFIID subunit 12 OS=Saccharomyces cerevisiae (strain ATCC 204508 / S288c) GN=TAF12 PE=1 SV=1

☐ Check to include this hit in error tolerant search or archive report

| Query                                                   | Observed  | Mr(expt)  | Mr(calc)  | ppm    | Miss | Score | Expect   | Rank | Unique | Peptide                                   |
|---------------------------------------------------------|-----------|-----------|-----------|--------|------|-------|----------|------|--------|-------------------------------------------|
| <input checked="" type="checkbox"/> <a href="#">28</a>  | 437.7330  | 873.4514  | 873.4708  | -22.29 | 0    | 52    | 0.012    | 1    | U      | K.TPAFVAYR.S                              |
| <input checked="" type="checkbox"/> <a href="#">76</a>  | 545.7853  | 1089.5561 | 1089.5720 | -14.53 | 0    | 30    | 1.5      | 1    | U      | K.LWQNFQVR.H                              |
| <input checked="" type="checkbox"/> <a href="#">84</a>  | 560.7793  | 1119.5441 | 1119.5560 | -10.65 | 0    | 61    | 0.00086  | 1    | U      | R.IPGYSADEIR.S                            |
| <input checked="" type="checkbox"/> <a href="#">114</a> | 596.8126  | 1191.6107 | 1191.6248 | -11.84 | 0    | 68    | 0.00022  | 1    | U      | K.QVYDALTLNR.R                            |
| <input checked="" type="checkbox"/> <a href="#">137</a> | 623.8084  | 1245.6023 | 1244.6109 | 797    | 0    | 12    | 67       | 2    | U      | K.NNGNNVASLNTK.K                          |
| <input checked="" type="checkbox"/> <a href="#">138</a> | 625.2900  | 1248.5654 | 1248.5809 | -12.34 | 0    | 53    | 0.0028   | 1    | U      | K.LPPYEMDTQR.V                            |
| <input checked="" type="checkbox"/> <a href="#">147</a> | 632.8101  | 1263.6056 | 1263.6208 | -11.96 | 0    | 71    | 7.6e-005 | 1    | U      | K.FLQESTQQQR.V                            |
| <input checked="" type="checkbox"/> <a href="#">220</a> | 703.8354  | 1405.6562 | 1405.6738 | -12.51 | 1    | 13    | 39       | 1    | U      | R.KWNPSQNYNQK.L                           |
| <input checked="" type="checkbox"/> <a href="#">295</a> | 803.8773  | 1605.7401 | 1605.7522 | -7.52  | 0    | 64    | 0.00024  | 1    | U      | K.QVLTPEENQEYK.L                          |
| <input checked="" type="checkbox"/> <a href="#">301</a> | 814.4290  | 1626.8434 | 1626.8464 | -1.89  | 0    | 5     | 3.3e+002 | 1    | U      | K.QTEPAIPISINISTK.T                       |
| <input checked="" type="checkbox"/> <a href="#">356</a> | 914.9431  | 1827.8717 | 1827.8823 | -5.82  | 0    | 92    | 4.7e-007 | 1    | U      | K.SQQQQNTITATNNPR.G                       |
| <input checked="" type="checkbox"/> <a href="#">379</a> | 951.9817  | 1901.9488 | 1901.9582 | -4.94  | 0    | 70    | 0.0001   | 1    | U      | K.ISSSNSTEIPSVTGPDAK.S                    |
| <input checked="" type="checkbox"/> <a href="#">513</a> | 787.7267  | 2360.1582 | 2360.1754 | -7.28  | 0    | 98    | 1e-007   | 1    | U      | R.SNRPTITGGSAMNASALNTPATK.L               |
| <input checked="" type="checkbox"/> <a href="#">695</a> | 1025.7227 | 4098.8617 | 4098.9104 | -11.87 | 0    | 59    | 0.00016  | 1    | U      | K.TVGIDEGDGETVIDGDVEELLDLADDFVTNVTAFSCR.L |

**TAF10 YEAST** Mass: 23005 Score: 369 Matches: 6(4) Sequences: 5(3) emPAI: 0.97

Transcription initiation factor TFIID subunit 10 OS=Saccharomyces cerevisiae (strain ATCC 204508 / S288c) GN=TAF10 PE=1 SV=1

☐ Check to include this hit in error tolerant search or archive report

| Query                                                   | Observed  | Mr(expt)  | Mr(calc)  | ppm    | Miss | Score | Expect   | Rank | Unique | Peptide                         |
|---------------------------------------------------------|-----------|-----------|-----------|--------|------|-------|----------|------|--------|---------------------------------|
| <input checked="" type="checkbox"/> <a href="#">51</a>  | 496.7347  | 991.4548  | 990.4883  | 976    | 0    | 34    | 0.27     | 1    | U      | K.NGFNVADV.R                    |
| <input checked="" type="checkbox"/> <a href="#">419</a> | 1026.9763 | 2051.9380 | 2051.9436 | -2.75  | 0    | 111   | 3.3e-009 | 1    | U      | R.EAVVDGSENAFGIPEFTR.K          |
| <input checked="" type="checkbox"/> <a href="#">601</a> | 934.1436  | 2799.4090 | 2799.4012 | 2.77   | 0    | 107   | 1.1e-008 | 1    | U      | R.QLLGGQQPGVQQISQQHQNEK.T       |
| <input checked="" type="checkbox"/> <a href="#">610</a> | 956.8307  | 2867.4702 | 2867.4817 | -4.04  | 0    | 118   | 9.4e-010 | 1    | U      | K.VVLTVNDLSAVALYGLNIGRDPFYR.-   |
| <input checked="" type="checkbox"/> <a href="#">611</a> | 717.8759  | 2867.4747 | 2867.4817 | -2.46  | 0    | (102) | 3.1e-008 | 1    | U      | K.VVLTVNDLSAVALYGLNIGRDPFYR.-   |
| <input checked="" type="checkbox"/> <a href="#">655</a> | 1118.5522 | 3352.6348 | 3352.6710 | -10.78 | 1    | 0     | 3.2e+002 | 1    | U      | K.DKTLLEIEMMDSTPIIPDAVIDYILTK.N |

**TAF4 YEAST** Mass: 42338 Score: 328 Matches: 10(8) Sequences: 10(8) emPAI: 0.83

Transcription initiation factor TFIID subunit 4 OS=Saccharomyces cerevisiae (strain YJM789) GN=TAF4 PE=3 SV=1

☐ Check to include this hit in error tolerant search or archive report

| Query                                                   | Observed | Mr(expt)  | Mr(calc)  | ppm    | Miss | Score | Expect   | Rank | Unique | Peptide                     |
|---------------------------------------------------------|----------|-----------|-----------|--------|------|-------|----------|------|--------|-----------------------------|
| <input checked="" type="checkbox"/> <a href="#">29</a>  | 444.7412 | 887.4679  | 887.4825  | -16.41 | 0    | 20    | 21       | 1    | U      | R.ASNVTAGLR.A               |
| <input checked="" type="checkbox"/> <a href="#">49</a>  | 494.7684 | 987.5223  | 987.5461  | -24.10 | 1    | 56    | 0.0045   | 1    | U      | R.RSEVSAAALR.A              |
| <input checked="" type="checkbox"/> <a href="#">78</a>  | 550.2655 | 1098.5164 | 1098.5305 | -12.84 | 0    | 65    | 0.00023  | 1    | U      | K.IDSEETLHR.A               |
| <input checked="" type="checkbox"/> <a href="#">113</a> | 596.2965 | 1190.5785 | 1190.5931 | -12.31 | 0    | 52    | 0.0076   | 1    | U      | K.EQNFNLTPTK.N              |
| <input checked="" type="checkbox"/> <a href="#">127</a> | 607.8511 | 1213.6877 | 1213.7030 | -12.65 | 0    | 65    | 0.00035  | 1    | U      | R.DILTNAIVISR.H             |
| <input checked="" type="checkbox"/> <a href="#">265</a> | 752.8698 | 1503.7250 | 1503.7416 | -11.01 | 0    | 84    | 3.5e-006 | 1    | U      | R.EEALINSSINASK.S           |
| <input checked="" type="checkbox"/> <a href="#">290</a> | 790.9084 | 1579.8023 | 1579.8206 | -11.55 | 0    | 59    | 0.0015   | 1    | U      | K.ASELWSLSPSPQIK.S          |
| <input checked="" type="checkbox"/> <a href="#">388</a> | 646.3383 | 1935.9930 | 1936.0054 | -6.42  | 0    | 90    | 8.4e-007 | 1    | U      | K.QYGLTSSVKNPTSLGAK.S       |
| <input checked="" type="checkbox"/> <a href="#">469</a> | 731.3647 | 2191.0723 | 2191.0997 | -12.48 | 0    | 9     | 90       | 1    | U      | K.IPNHLPLHPEQVSNYMR.K       |
| <input checked="" type="checkbox"/> <a href="#">499</a> | 775.3592 | 2323.0558 | 2323.0677 | -5.12  | 0    | 80    | 3.7e-006 | 1    | U      | K.STAHVSSSTHDAAGNTDDSVLPK.N |

**TAF9 YEAST** Mass: 17361 Score: 312 Matches: 6(5) Sequences: 5(4) emPAI: 1.44

Transcription initiation factor TFIID subunit 9 OS=Saccharomyces cerevisiae (strain ATCC 204508 / S288c) GN=TAF9 PE=1 SV=1

☐ Check to include this hit in error tolerant search or archive report

| Query                                                   | Observed  | Mr(expt)  | Mr(calc)  | ppm    | Miss | Score | Expect   | Rank | Unique | Peptide                        |
|---------------------------------------------------------|-----------|-----------|-----------|--------|------|-------|----------|------|--------|--------------------------------|
| <input checked="" type="checkbox"/> <a href="#">20</a>  | 404.7233  | 807.4321  | 807.4491  | -21.01 | 0    | 1     | 1.3e+003 | 7    | U      | R.YTQGVLK.D                    |
| <input checked="" type="checkbox"/> <a href="#">181</a> | 657.8446  | 1313.6746 | 1313.6914 | -12.78 | 0    | 66    | 0.00035  | 1    | U      | K.ALQVMGTWGV.R                 |
| <input checked="" type="checkbox"/> <a href="#">427</a> | 1037.9741 | 2073.9337 | 2073.9451 | -5.50  | 0    | 111   | 2.9e-009 | 1    | U      | K.NSVGSVSEVGPDSTQETPR.D        |
| <input checked="" type="checkbox"/> <a href="#">539</a> | 834.0529  | 2499.1368 | 2499.1514 | -5.82  | 0    | 123   | 1.7e-010 | 1    | U      | K.DALVYNDYAGSGNSAGSLGVDIR.L    |
| <input checked="" type="checkbox"/> <a href="#">650</a> | 829.6808  | 3314.6939 | 3314.7234 | -8.88  | 0    | (52)  | 0.0024   | 1    | U      | R.LLHLLASQSIHQYEDQVFLQDMFAHR.Y |
| <input checked="" type="checkbox"/> <a href="#">651</a> | 663.9461  | 3314.6940 | 3314.7234 | -8.87  | 0    | 59    | 0.00051  | 1    | U      | R.LLHLLASQSIHQYEDQVFLQDMFAHR.Y |

**TAF7 YEAST** Mass: 67571 Score: 263 Matches: 7(7) Sequences: 7(7) emPAI: 0.39

Transcription initiation factor TFIID subunit 7 OS=Saccharomyces cerevisiae (strain ATCC 204508 / S288c) GN=TAF7 PE=1 SV=1

☐ Check to include this hit in error tolerant search or archive report

| Query                                                   | Observed | Mr(expt)  | Mr(calc)  | ppm    | Miss | Score | Expect   | Rank | Unique | Peptide                   |
|---------------------------------------------------------|----------|-----------|-----------|--------|------|-------|----------|------|--------|---------------------------|
| <input checked="" type="checkbox"/> <a href="#">140</a> | 626.8319 | 1251.6491 | 1251.6724 | -18.57 | 0    | 45    | 0.041    | 1    | U      | K.HGISPPLYNVR.N           |
| <input checked="" type="checkbox"/> <a href="#">141</a> | 627.8289 | 1253.6432 | 1253.6615 | -14.66 | 0    | 64    | 0.00045  | 1    | U      | K.EEITIASAVGK.Q           |
| <input checked="" type="checkbox"/> <a href="#">175</a> | 652.3203 | 1302.6261 | 1302.6416 | -11.87 | 0    | 60    | 0.001    | 1    | U      | K.QLQQTEDSVQK.Q           |
| <input checked="" type="checkbox"/> <a href="#">182</a> | 657.8786 | 1313.7427 | 1313.7595 | -12.76 | 0    | 59    | 0.0013   | 1    | U      | R.ILPDIQLEFVK.N           |
| <input checked="" type="checkbox"/> <a href="#">211</a> | 698.3285 | 1394.6424 | 1394.6565 | -10.14 | 0    | 69    | 8.9e-005 | 1    | U      | K.QAEVSYDLVDK.S           |
| <input checked="" type="checkbox"/> <a href="#">248</a> | 735.3540 | 1468.6933 | 1468.7045 | -7.61  | 0    | 94    | 3.2e-007 | 1    | U      | K.NSLESGDYSIGISIK.W       |
| <input checked="" type="checkbox"/> <a href="#">522</a> | 802.7369 | 2405.1889 | 2405.2074 | -7.68  | 0    | 72    | 4.9e-005 | 1    | U      | R.QHTELLADELNELETTLAHTK.H |



**TAF8 YEAST** Mass: 58007 Score: 256 Matches: 5(5) Sequences: 5(5) emPAI: 0.32  
Transcription initiation factor TFIID subunit 8 OS=Saccharomyces cerevisiae (strain ATCC 204508 / S288c) GN=TAF8 PE=1 SV=1

☐ Check to include this hit in error tolerant search or archive report

| Query                                   | Observed  | Mr(expt)  | Mr(calc)  | ppm    | Miss | Score | Expect   | Rank | Unique | Peptide                                |
|-----------------------------------------|-----------|-----------|-----------|--------|------|-------|----------|------|--------|----------------------------------------|
| <input checked="" type="checkbox"/> 132 | 611.3470  | 1220.6794 | 1220.6989 | -16.02 | 0    | 47    | 0.021    | 1    | U      | R.NLHNLTLQR.R                          |
| <input checked="" type="checkbox"/> 312 | 832.9198  | 1663.8250 | 1663.8377 | -7.63  | 0    | 128   | 1.7e-010 | 1    | U      | K.TSESGTGTQSTIVQLR.N                   |
| <input checked="" type="checkbox"/> 516 | 1188.0700 | 2374.1254 | 2374.1481 | -9.57  | 0    | 46    | 0.014    | 1    | U      | R.EFNLDAPSLYQQFQASEFIK.S               |
| <input checked="" type="checkbox"/> 528 | 820.1125  | 2457.3156 | 2457.3366 | -8.55  | 0    | 67    | 0.0001   | 1    | U      | R.NLPDLTEISHLEIDAPVVEILK.K             |
| <input checked="" type="checkbox"/> 694 | 1012.4754 | 4045.8723 | 4045.9141 | -10.31 | 0    | 52    | 0.00098  | 1    | U      | K.SLSHISSASNTPPFGLDDEDAIEQQLEIWNALER.K |

**TAF11 YEAST** Mass: 40656 Score: 167 Matches: 7(4) Sequences: 7(4) emPAI: 0.48  
Transcription initiation factor TFIID subunit 11 OS=Saccharomyces cerevisiae (strain ATCC 204508 / S288c) GN=TAF11 PE=1 SV=1

☐ Check to include this hit in error tolerant search or archive report

| Query                                   | Observed | Mr(expt)  | Mr(calc)  | ppm    | Miss | Score | Expect   | Rank | Unique | Peptide               |
|-----------------------------------------|----------|-----------|-----------|--------|------|-------|----------|------|--------|-----------------------|
| <input checked="" type="checkbox"/> 116 | 599.2755 | 1196.5365 | 1196.5244 | 10.1   | 0    | 12    | 31       | 3    | U      | R.TQEGGQGSFMR.-       |
| <input checked="" type="checkbox"/> 137 | 623.8084 | 1245.6023 | 1245.6313 | -23.26 | 0    | 63    | 0.00057  | 1    | U      | R.TGGTSINNQLNK.Y      |
| <input checked="" type="checkbox"/> 167 | 645.8388 | 1289.6630 | 1289.6827 | -15.27 | 0    | 47    | 0.03     | 1    | U      | R.ETTLGNSLLQSK.S      |
| <input checked="" type="checkbox"/> 242 | 726.8643 | 1451.7140 | 1451.7521 | -26.22 | 0    | 10    | 1e+002   | 1    | U      | K.YNNSPLLPEHTR.E      |
| <input checked="" type="checkbox"/> 275 | 765.4046 | 1528.7947 | 1528.8209 | -17.16 | 1    | 53    | 0.0066   | 1    | U      | K.LLVTNLDKQDTNR.F     |
| <input checked="" type="checkbox"/> 299 | 808.9257 | 1615.8368 | 1615.8529 | -9.98  | 0    | 84    | 4.3e-006 | 1    | U      | K.LASTVANQTISENIR.V   |
| <input checked="" type="checkbox"/> 363 | 920.9851 | 1839.9556 | 1839.9771 | -11.64 | 0    | 34    | 0.36     | 1    | U      | K.VNYPPILTIANIFYSTK.Q |

**TAF13 YEAST** Mass: 19235 Score: 38 Matches: 1(1) Sequences: 1(1) emPAI: 0.18  
Transcription initiation factor TFIID subunit 13 OS=Saccharomyces cerevisiae (strain ATCC 204508 / S288c) GN=TAF13 PE=1 SV=2

☐ Check to include this hit in error tolerant search or archive report

| Query                                   | Observed  | Mr(expt)  | Mr(calc)  | ppm   | Miss | Score | Expect | Rank | Unique | Peptide                                             |
|-----------------------------------------|-----------|-----------|-----------|-------|------|-------|--------|------|--------|-----------------------------------------------------|
| <input checked="" type="checkbox"/> 719 | 1049.2987 | 5241.4572 | 5241.5023 | -8.62 | 0    | 38    | 0.01   | 1    | U      | K.DVSSLLYAYGDVFPQLQATVQCCLDELVSGLVDVCTNAFHTAQNSQR.N |

**Supplementary Figure S2.** Mass spectrometry results showing that all 14 TAFs are present in the purified complex.

pmol TBP 1 2 3 4

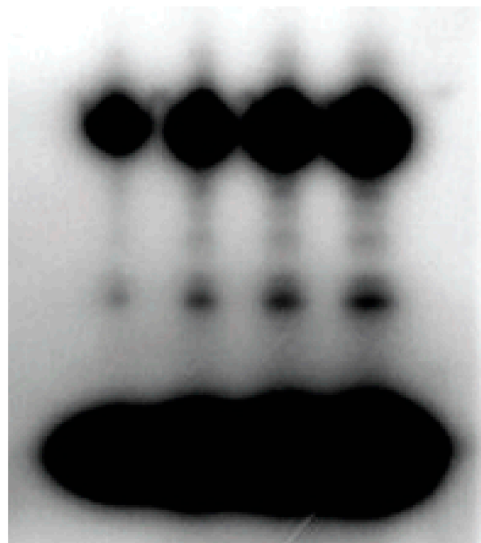

**Supplementary Figure S3.** EMSA in 2% agarose gel for TBP on RPS5. TBP alone binds RPS5 forming at least two specific complexes with one or more TBP molecules bound.

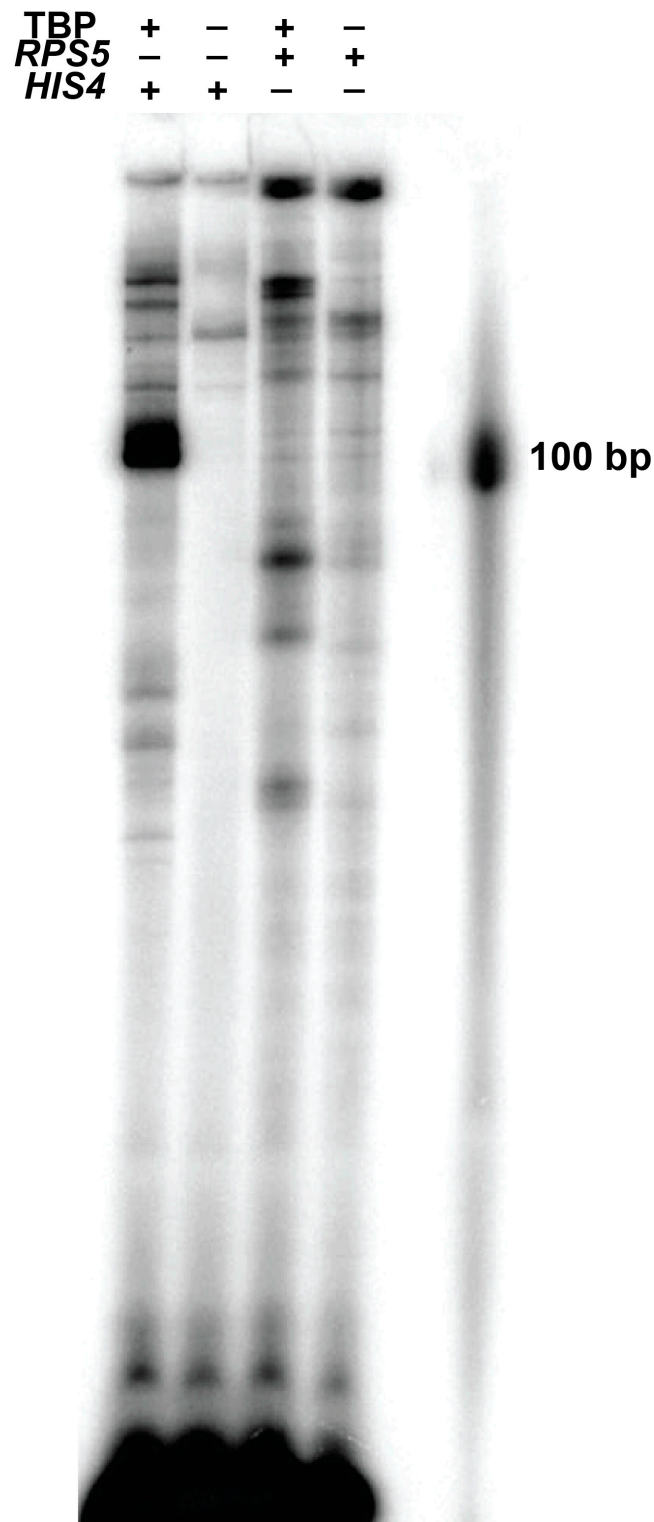

**Supplementary Figure S4.** Positive and negative controls for transcription run-off assays. Lane 1: Run-off products from the *HIS4* TATA promoter to assess the activity of purified GTFs without the TAF complex. Lane 2: Negative control; same as Lane 1 minus TBP and TAFs. Lane 3: Run-off products from the *RPS5* TATA-less promoter in the presence of TBP only (minus TAFs). This establishes the TBP-directed transcription background. Lane 4: Negative control to establish *RPS5* background transcription (minus TBP minus TAFs). Comparing Lanes 3 and 4 reveals the strongest top band that is much longer than 100 bp, inconsistent with the mRNA products detected in vivo. This band corresponds to an artificial

transcript from a TSS located approximately 25 bp downstream of the pseudo-TATA box. Rightmost lane: 100 bp ladder.

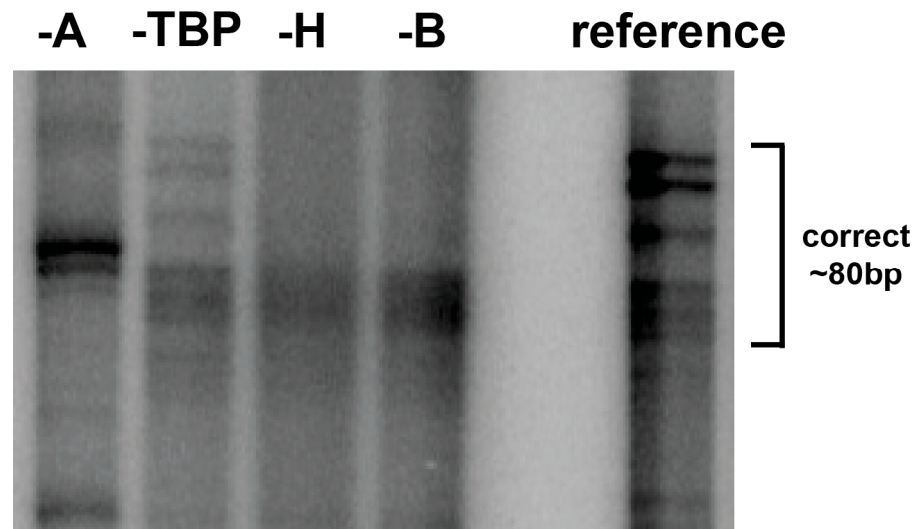

**Supplementary Figure S5.** Negative controls for transcription run-off assays on *RPS5* with TAFs present. Lane 1: Omitting TFIIA. Lane 2: Omitting TBP. Lane 3: Omitting TFIIH. Lane 4: Omitting TFIIB. Faint correct bands are observed when TBP is omitted, which we attribute to the 3% contamination of TBP in our TAF complex preparation.
